# Supplementary material for: Photo-response modulation of organic transistors for multi-level light sensing using active layer microstructure control
Source: Royal Society of Chemistry journal article supplement (doi:10.1039/d3tc00454f), 2023-01-01
Supplement: d3tc00454f1.pdf [file d3tc00454f1.pdf]

## Supporting information

### **Photo-response Modulation of Organic Transistors for Multi-level Light Sensing using Active Layer Microstructure Control**

*Dohyeong Park<sup>+,1</sup>, Gergely Tarsoly<sup>+,1</sup>, Dongyub Kwon<sup>1</sup>, Tae Joo Shin<sup>2</sup>, Seungmoon Pyo<sup>\*,1</sup>*

<sup>1</sup>Department of Chemistry, Konkuk University, 120 Neungdong-ro, Gwangjin-gu, Seoul, 05029, Republic of Korea

<sup>2</sup>Ulsan National Institute of Science and Technology, UNIST Central Research Facilities, Ulsan, Republic of Korea

<sup>+</sup>Equal contribution

<sup>\*</sup>Corresponding author (+82-2-450-3397), E-mail: [pyosm@konkuk.ac.kr](mailto:pyosm@konkuk.ac.kr)

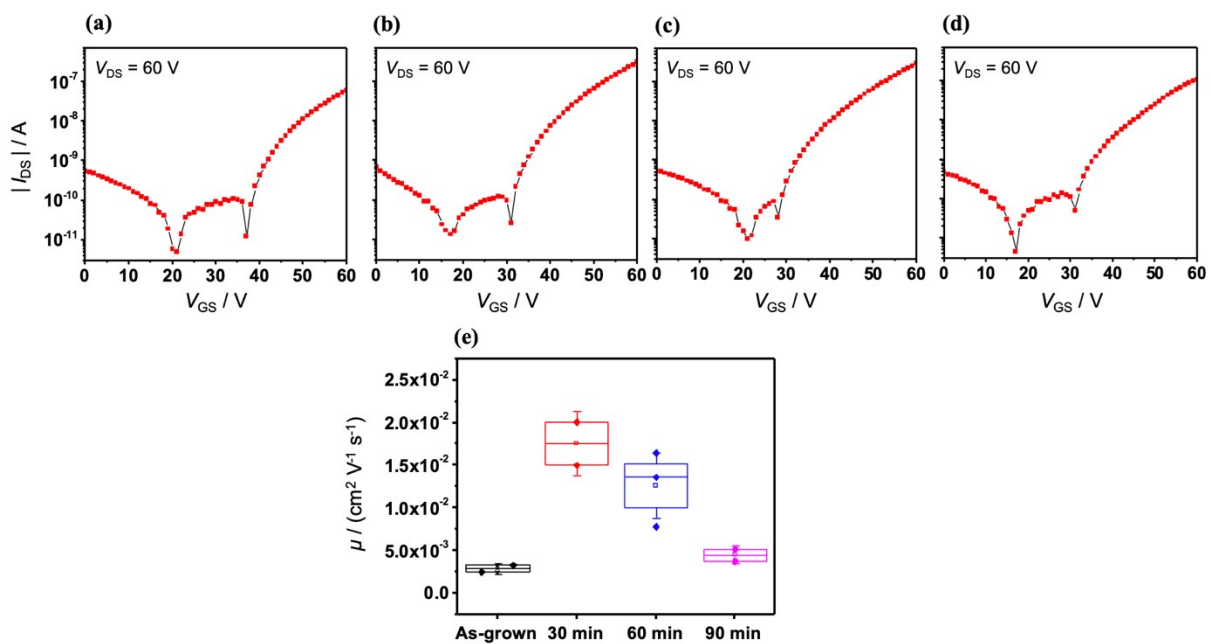

Figure S1. Transfer characteristics of devices with PTCDI-C<sub>13</sub> films: (a) as-grown film, SVA treated (DCM vapor) film for (b) 30 min, (c) 60 min and (d) 90 min, and (e) measured field-effect mobilities of the devices.

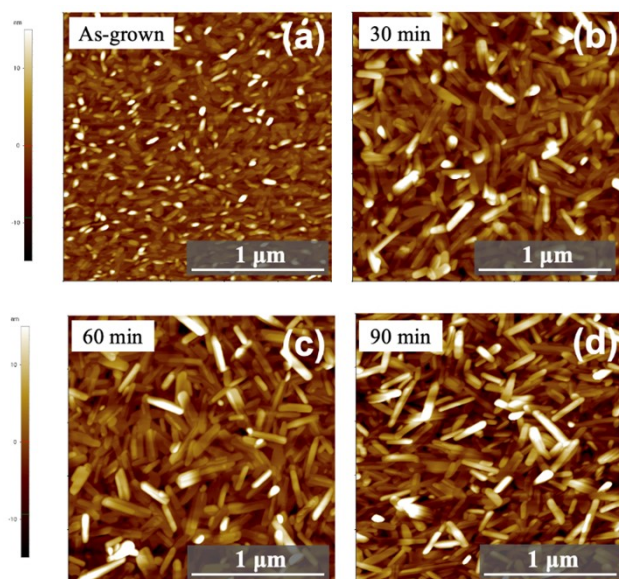

Figure S2. AFM images of PTCDI-C<sub>13</sub> films: (a) as-grown film, SVA treated (DCM vapor) film for (b) 30 min, (c) 60 min, and (d) 90 min.

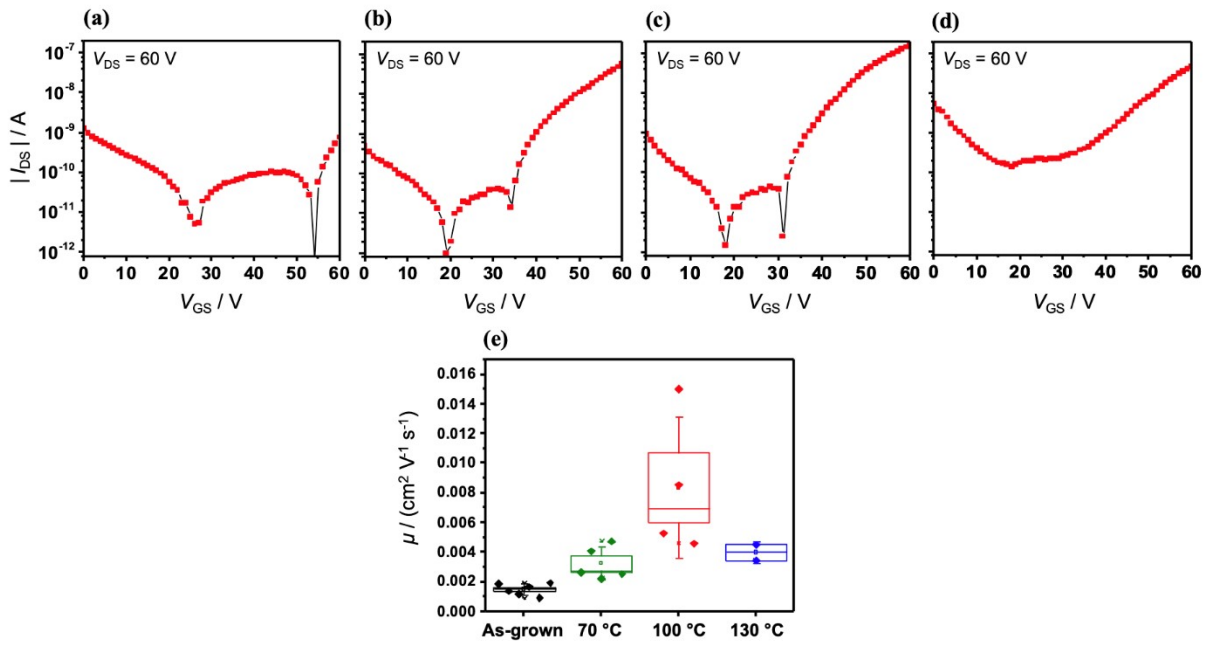

Figure S3. Transfer characteristics of devices with PTCDI-C<sub>13</sub> films: (a) as-grown film, TA treated film at (b) 70 °C, (c) 100 °C, and (d) 130 °C for 15 min and, (e) measured field-effect mobilities of the devices.

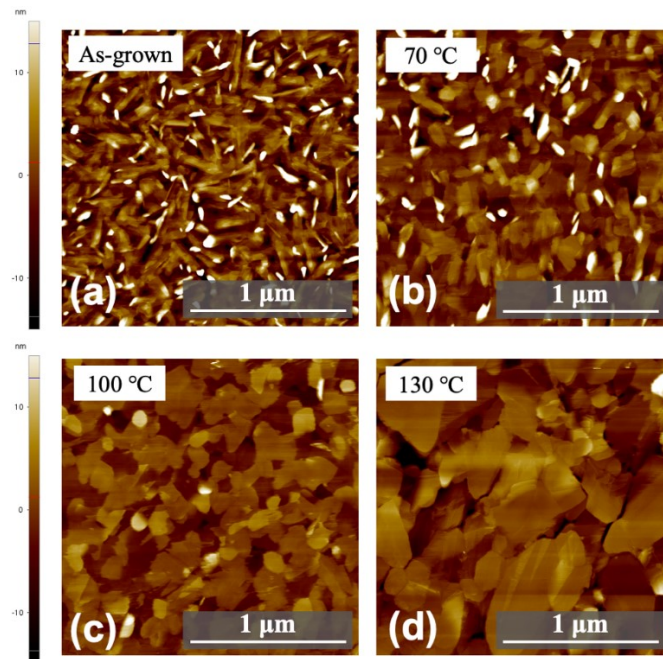

Figure S4. AFM images of PTCDI-C<sub>13</sub> films: (a) as-grown film, TA treated film at (b) 70 °C, (c) 100 °C, and (d) 130 °C for 15 min.
